# Supplementary material for: Update der Point-of-care-basierten Gerinnungstherapie
Source: Springer Nature journal article supplement (doi:10.1007/s00101-023-01368-z), 2024-01-23
Supplement: MOESM2 [file 26653608]

# Algorithmus ClotPro

## zur Gerinnungstherapie bei perioperativen Blutungen

|                    |                          |                                  |             |                       |        |                               |  |                       |
|--------------------|--------------------------|----------------------------------|-------------|-----------------------|--------|-------------------------------|--|-----------------------|
| <b>Patient ID:</b> | <b>Rahmenbedingungen</b> |                                  |             |                       |        |                               |  |                       |
|                    |                          |                                  |             | OK                    |        |                               |  | OK                    |
| <b>Datum:</b>      | <b>BGA</b>               | pH                               | > 7.2       | <input type="radio"/> | Hb     | 7-9 g/dl                      |  | <input type="radio"/> |
|                    |                          | BE                               | > -6 mmol/l | <input type="radio"/> | Thromb | > 50 /nl (100/nl bei SHT/ICB) |  | <input type="radio"/> |
|                    |                          | Temp.                            | > 36 °C     | <input type="radio"/> | Fib    | 1.5-2 g/l                     |  | <input type="radio"/> |
|                    |                          | Ca <sup>2+</sup>                 | > 1 mmol/l  | <input type="radio"/> | INR    | < 1.5                         |  | <input type="radio"/> |
|                    |                          | Unnötige Hämodilution vermeiden! |             |                       | PTT    | < 50 s                        |  | <input type="radio"/> |

| Reversierung von Antikoagulantien |                            |                              |                                          |
|-----------------------------------|----------------------------|------------------------------|------------------------------------------|
| Vitamin-K Antagonisten            | Phenprocoumon/Acenocumarol | Empirisch : 25-50 IE/kg PPSB | <input style="width: 80%;" type="text"/> |

|                    |                                 |                                                                                                                       |                                          |
|--------------------|---------------------------------|-----------------------------------------------------------------------------------------------------------------------|------------------------------------------|
| Aggregationshemmer | ASS +/- ADP-Rezeptor Antagonist | Empirisch : 2 TK, erwäge 0.4 µg/kg DDAVP<br><small>(Nur falls noch nicht erfolgt; einmaliger Therapieversuch)</small> | <input style="width: 80%;" type="text"/> |
|--------------------|---------------------------------|-----------------------------------------------------------------------------------------------------------------------|------------------------------------------|

|          |          |               |                                                                                                                                  |                                          |                                          |
|----------|----------|---------------|----------------------------------------------------------------------------------------------------------------------------------|------------------------------------------|------------------------------------------|
| RVV-test | DOAK     |               |                                                                                                                                  |                                          |                                          |
| ECA-test | ClotPro™ | Xa-Inhibitor  | CT <sub>RVV-test</sub> oder empirisch <input style="width: 40px;" type="text"/> > 170 sec<br>+ CT <sub>ECA-test</sub> normwertig | 25-50 IE/kg PPSB<br>oder Andexanet alfa* | <input style="width: 80%;" type="text"/> |
|          |          | Ila-Inhibitor | CT <sub>ECA-test</sub> oder empirisch <input style="width: 40px;" type="text"/> > 190 sec                                        | Idarucizumab<br>oder 25-50 IE/kg PPSB    | <input style="width: 80%;" type="text"/> |

|          |          |                                                                                                                                                                                 |                                                                                                                                                         |
|----------|----------|---------------------------------------------------------------------------------------------------------------------------------------------------------------------------------|---------------------------------------------------------------------------------------------------------------------------------------------------------|
| EX-test  | ClotPro™ | <b>Fibrinolyse</b>                                                                                                                                                              |                                                                                                                                                         |
|          |          | Bei hämorrhagischem Schock, peripartaler Blutung oder Koagulopathie: 1g TXA als Kurzinfusion (erste Gabe < 3h nach onset).<br>Ggf. 2. Gabe von 1g TXA als Kurzinfusion erwägen. |                                                                                                                                                         |
| FIB-test |          | oder bei Lysezeichen im POC-Test                                                                                                                                                | CLI-30 <sub>EXT-test</sub> <input style="width: 40px;" type="text"/> < 85 %<br>A10 <sub>FIB-test</sub> <input style="width: 40px;" type="text"/> < 2 mm |

|          |          |                                                                                                                                 |                                                                            |
|----------|----------|---------------------------------------------------------------------------------------------------------------------------------|----------------------------------------------------------------------------|
| EX-test  | ClotPro™ | <b>Fibrinpolymerisation</b>                                                                                                     |                                                                            |
|          |          | A10 <sub>EX-test</sub> <input style="width: 40px;" type="text"/> < 40 mm                                                        | A10 <sub>FIB-test</sub> <input style="width: 40px;" type="text"/> >= 12 mm |
|          |          | 2 TK, erwäge 0.4 µg/kg DDAVP<br><small>(Nur falls noch nicht erfolgt; einmaliger Therapieversuch)</small>                       |                                                                            |
| FIB-test |          | < 40 mm und < 12 mm                                                                                                             |                                                                            |
|          |          | 25 mg/kg Fibrinogen                                                                                                             |                                                                            |
|          |          | < 40 mm und < 10 mm                                                                                                             |                                                                            |
|          |          | 50 mg/kg Fibrinogen                                                                                                             |                                                                            |
|          |          | < 40 mm und < 8 mm                                                                                                              |                                                                            |
|          |          | 75 mg/kg Fibrinogen                                                                                                             |                                                                            |
|          |          | < 30 mm und < 8 mm                                                                                                              |                                                                            |
|          |          | 75 mg/kg Fibrinogen + 2 TK, erwäge 0.4 µg/kg DDAVP<br><small>(Nur falls noch nicht erfolgt; einmaliger Therapieversuch)</small> |                                                                            |

|         |          |                                                                        |                      |
|---------|----------|------------------------------------------------------------------------|----------------------|
| EX-test | ClotPro™ | <b>Plasmatische Gerinnung</b>                                          |                      |
|         |          | CT <sub>EX-test</sub> > 90 sec und<br>A10 <sub>FIB-TEM</sub> >= 12 mm  | 25-50 IU/kg PPSB     |
| IN-test |          | CT <sub>IN-test</sub> > 250 sec und Rest-Heparinwirkung ausgeschlossen | erwäge 20 ml/kg FFP  |
| HI-test |          | CT <sub>HI-test</sub> < CT <sub>IN-test</sub> (Unterschied > 50 sec)   | erwäge Protamin-Gabe |

|      |             |                                                                         |                                                                                                           |
|------|-------------|-------------------------------------------------------------------------|-----------------------------------------------------------------------------------------------------------|
| ADP  | Multiplate™ | <b>Fortbestehende Blutung trotz normwertiger Gerinnungstests</b>        |                                                                                                           |
| ASPI |             | <b>Thrombozytenfunktion</b>                                             |                                                                                                           |
|      |             | AUC <sub>ASPI-test</sub> < 40 U                                         | 2 TK, erwäge 0.4 µg/kg DDAVP<br><small>(Nur falls noch nicht erfolgt; einmaliger Therapieversuch)</small> |
|      |             | AUC <sub>ADP-test</sub> < 40 U                                          |                                                                                                           |
|      |             | <b>Faktor XIII</b> Empirisch oder strebe Faktor XIII Aktivität > 60% an | 15-20 IE/kg/KG                                                                                            |

|                     |          |
|---------------------|----------|
| <b>Ultima Ratio</b> |          |
| rFVII a             | 90 µg/kg |

\*bei lebensbedrohlichen Blutungen unter Apixaban oder Rivaroxaban Einnahme
